# Supplementary material for: Patterning of amorphous-InGaZnO thin-film transistors by stamping of surface-modified polydimethylsiloxane
Source: Royal Society of Chemistry journal article supplement (doi:10.1039/c6ra06264d), 2016-01-01
Supplement: c6ra06264d1.pdf [file c6ra06264d1.pdf]

## Supporting information

### Patterning of Amorphous-InGaZnO Thin-Film Transistors by Stamping of Surface-Modified Polydimethylsiloxane

Chungwan Gu and Jang-Sik Lee\*

*Department of Materials Science and Engineering, Pohang University of Science and  
Technology (POSTECH), Pohang 790-784, Republic of Korea*

\*E-mail: jangsik@postech.ac.kr

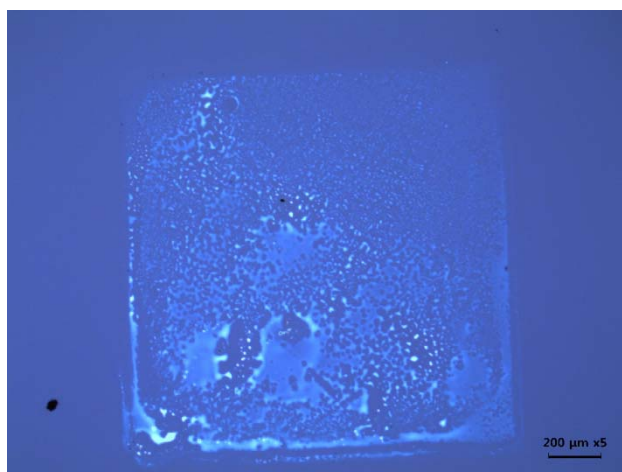

**Fig. S1** Transferred IGZO layer on SiO<sub>2</sub>/Si substrate. The PDMS stamp was not treated with piranha solution and UV-ozone.

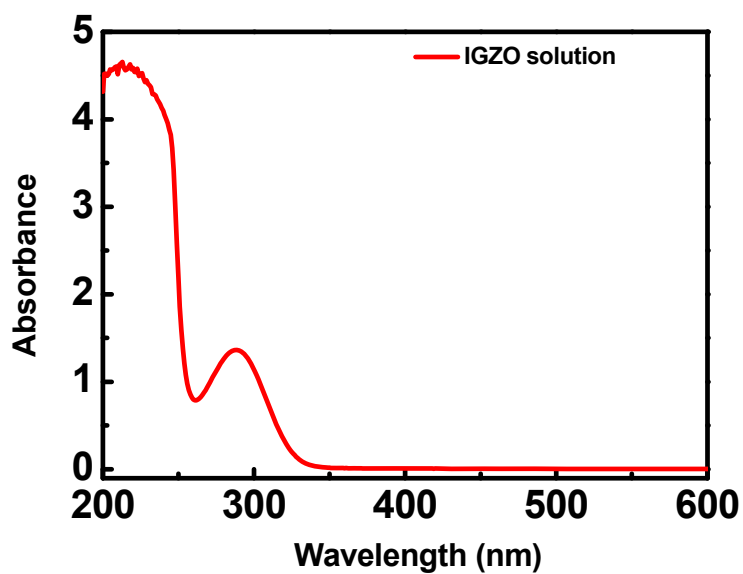

Fig. S2 Optical absorbance of IGZO solution.

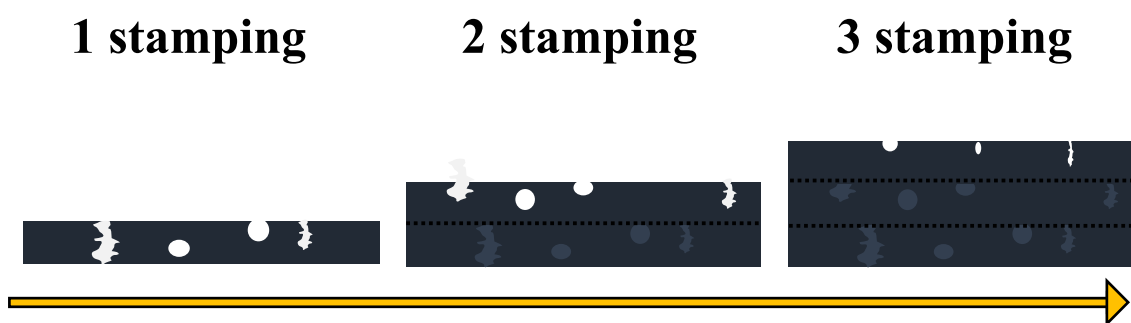

Fig. S3 Schematic illustration to show passivation of stamped layer by subsequent stamping process.

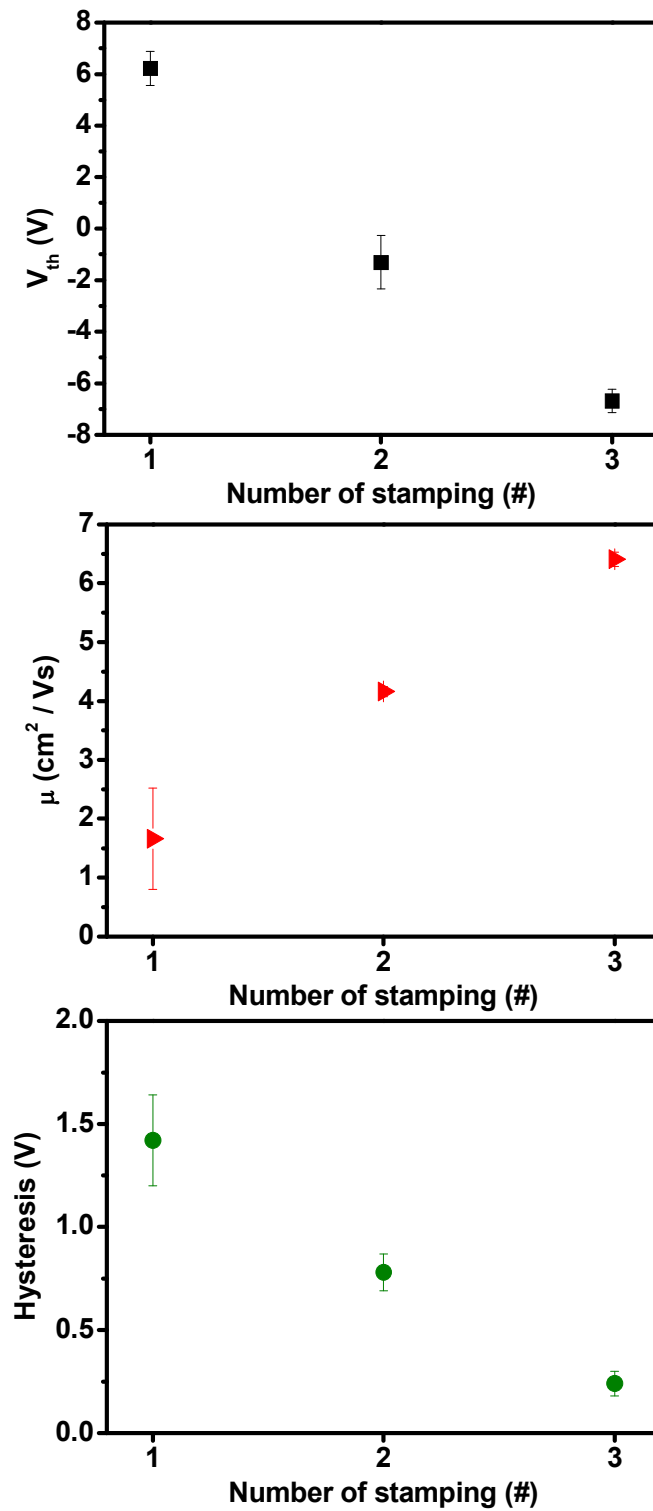

**Fig. S4** The changes in electrical properties of stamped IGZO TFTs with the number of stamping layers.
